# Supplementary material for: Manganese salophen covalently anchored to amino-functionalized graphene oxide as an efficient heterogeneous catalyst for selective epoxidation
Source: Royal Society of Chemistry journal article supplement (doi:10.1039/d4ra05280c), 2024-01-01
Supplement: d4ra05280c1.pdf [file d4ra05280c1.pdf]

**Table S1.** Comparison of TOF( $\text{h}^{-1}$ ) obtained in the presence of  $\text{GO.NH}_2@\text{MnSalop}$  with  $\text{CFeGO}@\text{MnSalBr}$  for the epoxidation of alkenes with  $\text{H}_2\text{O}_2/\text{NaHCO}_3$ .

| Substrate               | TOF( $\text{h}^{-1}$ )                   |                                            |
|-------------------------|------------------------------------------|--------------------------------------------|
|                         | $\text{CFeGO}@\text{MnSalBr}^{\text{a}}$ | $\text{GO.NH}_2@\text{MnSalop}^{\text{b}}$ |
| Cyclooctene             | 96.1                                     | 159.5                                      |
| Cyclohexene             | 63.3                                     | 151.4                                      |
| Styrene                 | 64.6                                     | 143.3                                      |
| $\alpha$ -Methylstyrene | 80                                       | 149.8                                      |
| Limonene                | 46.7                                     | 120.5                                      |
| 1- hexene               | 21.7                                     | 58.6                                       |
| 1- octen                | 16.2                                     | 40.7                                       |

<sup>a</sup>Reaction conditions: the molar ratios for catalyst:olefin: $\text{H}_2\text{O}_2$ : $\text{NaHCO}_3$  are (3:50:500:50), EtOH (4mL).

<sup>b</sup>Reaction conditions: the molar ratios for catalyst:olefin: $\text{H}_2\text{O}_2$ : $\text{NaHCO}_3$  are (2:27:270:27), EtOH (4mL).
